# Supplementary material
Source: PubMed Central journal article supplement (PMC7576672)
Supplement: NIHMS998259-supplement-1.pdf [file NIHMS998259-supplement-1.pdf]

**Supplementary Table 1. Association between Inflammation Proteins Tested from a High Sensitivity Cytokine Panel and Gallstone risk, Shanghai, China, 1997 - 2001.**

| Inflammation Proteins and Category | No. of Cases | No. of Controls | Age- and Sex- Adjusted     | Multivariable- Adjusted    |
|------------------------------------|--------------|-----------------|----------------------------|----------------------------|
|                                    |              |                 | ORs (95% CIs) <sup>a</sup> | ORs (95% CIs) <sup>b</sup> |
| <b>IL-1<math>\beta</math></b>      |              |                 |                            |                            |
| Q1                                 | 19           | 38              | reference                  | reference                  |
| Q2                                 | 42           | 37              | 2.3 (1.1, 4.8)             | 3.2 (1.4, 7.7)             |
| Q3                                 | 28           | 39              | 1.3 (0.6, 2.7)             | 1.4 (0.6, 3.5)             |
| Q4                                 | 61           | 35              | 3.1 (1.6, 6.4)             | 3.2 (1.4, 7.9)             |
| <i>P</i> trend <sup>c</sup>        |              |                 | 0.010                      | 0.058                      |
| <b>IL-4</b>                        |              |                 |                            |                            |
| Q1                                 | 22           | 38              | reference                  | reference                  |
| Q2                                 | 43           | 37              | 1.9 (0.9, 3.8)             | 2.1 (0.9, 4.9)             |
| Q3                                 | 27           | 37              | 1.1 (0.5, 2.4)             | 1.1 (0.4, 2.8)             |
| Q4                                 | 58           | 37              | 2.4 (1.2, 4.8)             | 2.6 (1.1, 6.2)             |
| <i>P</i> trend <sup>c</sup>        |              |                 | 0.046                      | 0.083                      |
| <b>IL-7</b>                        |              |                 |                            |                            |
| Q1                                 | 22           | 38              | reference                  | reference                  |
| Q2                                 | 29           | 37              | 1.4 (0.7, 3.0)             | 1.71 (0.7, 4.1)            |
| Q3                                 | 38           | 37              | 1.8 (0.9, 3.7)             | 1.91 (0.8, 4.4)            |
| Q4                                 | 61           | 37              | 2.8 (1.4, 5.6)             | 2.50 (1.1, 5.6)            |
| <i>P</i> trend <sup>c</sup>        |              |                 | 0.002                      | 0.027                      |
| <b>IL-8</b>                        |              |                 |                            |                            |
| Q1                                 | 26           | 39              | reference                  | reference                  |
| Q2                                 | 31           | 36              | 1.3 (0.6, 2.6)             | 1.7 (0.7, 3.9)             |
| Q3                                 | 49           | 37              | 2.1 (1.1, 4.1)             | 2.3 (1.0, 5.2)             |
| Q4                                 | 44           | 37              | 1.9 (0.9, 3.7)             | 2.4 (1.0, 5.5)             |
| <i>P</i> trend <sup>c</sup>        |              |                 | 0.036                      | 0.033                      |
| <b>IL-17<math>\alpha</math></b>    |              |                 |                            |                            |
| Q1                                 | 30           | 38              | reference                  | reference                  |
| Q2                                 | 29           | 38              | 0.9 (0.4, 1.7)             | 1.2 (0.5, 2.7)             |
| Q3                                 | 32           | 36              | 1.0 (0.5, 2.0)             | 1.1 (0.5, 2.6)             |

|                             |    |    |                |                |
|-----------------------------|----|----|----------------|----------------|
| Q4                          | 59 | 37 | 1.7 (0.9, 3.3) | 1.7 (0.8, 3.7) |
| <i>P</i> trend <sup>c</sup> |    |    | 0.076          | 0.183          |
| <b>IL-23</b>                |    |    |                |                |
| Q1                          | 25 | 39 | reference      | reference      |
| Q2                          | 23 | 36 | 1.0 (0.5, 2.0) | 1.0 (0.4, 2.3) |
| Q3                          | 45 | 37 | 1.8 (0.9, 3.5) | 1.8 (0.8, 4.0) |
| Q4                          | 57 | 37 | 2.2 (1.2, 4.4) | 1.3 (0.6, 2.8) |
| <i>P</i> trend <sup>c</sup> |    |    | 0.004          | 0.327          |
| <b>CCL3</b>                 |    |    |                |                |
| Q1                          | 25 | 38 | reference      | reference      |
| Q2                          | 26 | 37 | 1.0 (0.5, 2.2) | 1.0 (0.4, 2.3) |
| Q3                          | 60 | 37 | 2.3 (1.2, 4.4) | 2.1 (1.0, 4.5) |
| Q4                          | 39 | 37 | 1.6 (0.8, 3.2) | 1.2 (0.5, 2.8) |
| <i>P</i> trend <sup>c</sup> |    |    | 0.047          | 0.266          |
| <b>CCL20</b>                |    |    |                |                |
| Q1                          | 41 | 38 | reference      | reference      |
| Q2                          | 43 | 37 | 1.0 (0.5, 1.9) | 1.2 (0.5, 2.5) |
| Q3                          | 35 | 37 | 0.8 (0.4, 1.6) | 0.6 (0.3, 1.3) |
| Q4                          | 31 | 37 | 0.7 (0.4, 1.4) | 0.7 (0.3, 1.5) |
| <i>P</i> trend <sup>c</sup> |    |    | 0.293          | 0.183          |
| <b>GM-CSF</b>               |    |    |                |                |
| Q1                          | 42 | 38 | reference      | reference      |
| Q2                          | 38 | 37 | 0.9 (0.5, 1.7) | 0.6 (0.3, 1.3) |
| Q3                          | 34 | 37 | 0.7 (0.4, 1.4) | 0.7 (0.3, 1.6) |
| Q4                          | 36 | 37 | 0.8 (0.4, 1.5) | 0.5 (0.2, 1.0) |
| <i>P</i> trend <sup>c</sup> |    |    | 0.399          | 0.112          |

Abbreviations: CCL, CC-Chemokine Ligand; CI, confidence interval; GM-CSF, Granulocyte macrophage-colony stimulating factor; IL: interleukin; Q, quartile; OR, odds ratio

a Adjusted for age and sex.

b Adjusted for age, sex, body mass index, education level, smoking, alcohol drinking, self-reported history of diabetes, and history of cholecystitis.

c Two-sided *P* values for trend across protein categories were assessed with the Wald test using categorical values of the proteins with 1 degree of freedom.

**Supplementary Table 2. Odds ratios (ORs) and 95% confidence intervals (CIs) of gallstones associated with inflammation proteins**

| Inflammation Proteins | Sex            |                |                        | BMI                   |                     |                        | Diabetes       |                |                        |
|-----------------------|----------------|----------------|------------------------|-----------------------|---------------------|------------------------|----------------|----------------|------------------------|
|                       | Women          | Men            | <i>P</i> heterogeneity | Underweight or Normal | Overweight or Obese | <i>P</i> heterogeneity | No             | Yes            | <i>P</i> heterogeneity |
| <b>IL-6</b>           | 1.5 (1.1, 1.9) | 1.6 (1.1, 2.4) | 0.541                  | 1.6 (1.2, 2.0)        | 1.4 (0.9, 2.1)      | 0.669                  | 1.5 (1.2, 1.9) | 1.2 (0.6, 2.6) | 0.56                   |
| <b>IL-10</b>          | 1.4 (1.1, 1.9) | 1.6 (1.1, 2.3) | 0.731                  | 1.5 (1.2, 1.9)        | 1.3 (0.8, 2.0)      | 0.649                  | 1.5 (1.2, 1.9) | 1.2 (0.6, 2.3) | 0.491                  |
| <b>IL-12 (p70)</b>    | 1.6 (1.2, 2.1) | 1.8 (1.2, 2.6) | 0.723                  | 1.7 (1.3, 2.2)        | 1.4 (0.9, 2.1)      | 0.376                  | 1.8 (1.4, 2.3) | 1.1 (0.5, 2.2) | 0.113                  |
| <b>IL-13</b>          | 1.3 (1.0, 1.7) | 1.8 (1.2, 2.7) | 0.338                  | 1.5 (1.1, 1.9)        | 1.4 (0.9, 2.2)      | 0.941                  | 1.6 (1.2, 2.0) | 1.1 (0.5, 2.4) | 0.397                  |

Ordinal ORs reflecting the linear change per category were estimated based on unconditional logistic regression models, adjusting for age and sex. *P* value from two-sided likelihood ratio test for heterogeneity of ORs across subgroups of participants.
